# Supplementary material for: Amplified detection of nucleic acids and proteins using an isothermal proximity CRISPR Cas12a assay
Source: Royal Society of Chemistry journal article supplement (doi:10.1039/d0sc06113a), 2021-01-01
Supplement: d0sc06113a1.pdf [file d0sc06113a1.pdf]

## Supporting Information

### **Amplified detection of nucleic acids and proteins using an isothermal proximity CRISPR Cas12a assay**

Yongya Li,<sup>a,b</sup> Hayam Mansour,<sup>b,c</sup> Colton J. F. Watson,<sup>d</sup> Yanan Tang,<sup>a,\*</sup> Adam J. MacNeil,<sup>d</sup> and Feng Li<sup>a,b,\*</sup>

<sup>a</sup>Key Laboratory of Green Chemistry & Technology of Ministry of Education, College of Chemistry, Analytical & Testing Center, Sichuan University, 29 Wangjing Road, Chengdu, Sichuan, China, 610064

<sup>b</sup>Department of Chemistry, Centre for Biotechnology, Brock University, St. Catharines, Ontario, Canada, L2S 3A1.

<sup>c</sup>Department of Cell Biology, National Research Center, Egypt, 12622

<sup>d</sup>Department of Health Sciences, Brock University, St. Catharines, Ontario, Canada, L2S 3A1.

#### **Content**

**Table S1. DNA sequences and modifications.**

**Figure S1. Direct detection of dsDNA and ssDNA using direct CRISPR RNA (crRNA) recognition and Cas12a cleavage**

**Figure S2. Optimization of the concentrations of proximity probes P1 and P2 for iPCCA.**

**Figure S3. Optimization of the concentrations of DNA polymerase (Klenow Fragment, unit) for iPCCA.**

**Figure S4. Optimization of nicking endonuclease for iPCCA.**

**Figure S5. Quantitative profiling of allergen-mediated mast cell activation in three independent cultures.**

**Table S1. DNA sequences and modifications.**

| Name                          | Sequence (5'→3')                                                                   |
|-------------------------------|------------------------------------------------------------------------------------|
| <b>Nucleic Acid Detection</b> |                                                                                    |
| P2 (Template)                 | GCT TGT GGC CG TTTA CGT CGC CGT CCA GCT CGA CCTCAGC CGTAGA TT GAC TCT GGC TTT-InvT |
| P1 (Primer)                   | ATC TCT CTG AAG TT TCTACG                                                          |
| Blocking DNA                  | TTT TTT CGTAGA <sup>c</sup>                                                        |
| Synthetic Target              | AAA AGA TAA CAA GAA AGAC AAA GCC AGA GTC CTT CAG AGA GATA CAG AAC TCT AAT TCA      |
| <b>CRISPR-Cas12a</b>          |                                                                                    |
| crRNA                         | UAA UUU CUA CUA AGU GUA GAU CGU CGC CGU CCA GCU CGA CC                             |
| Signal Reporter               | FAM-TTATT-Quencher                                                                 |

**Supporting Figures**

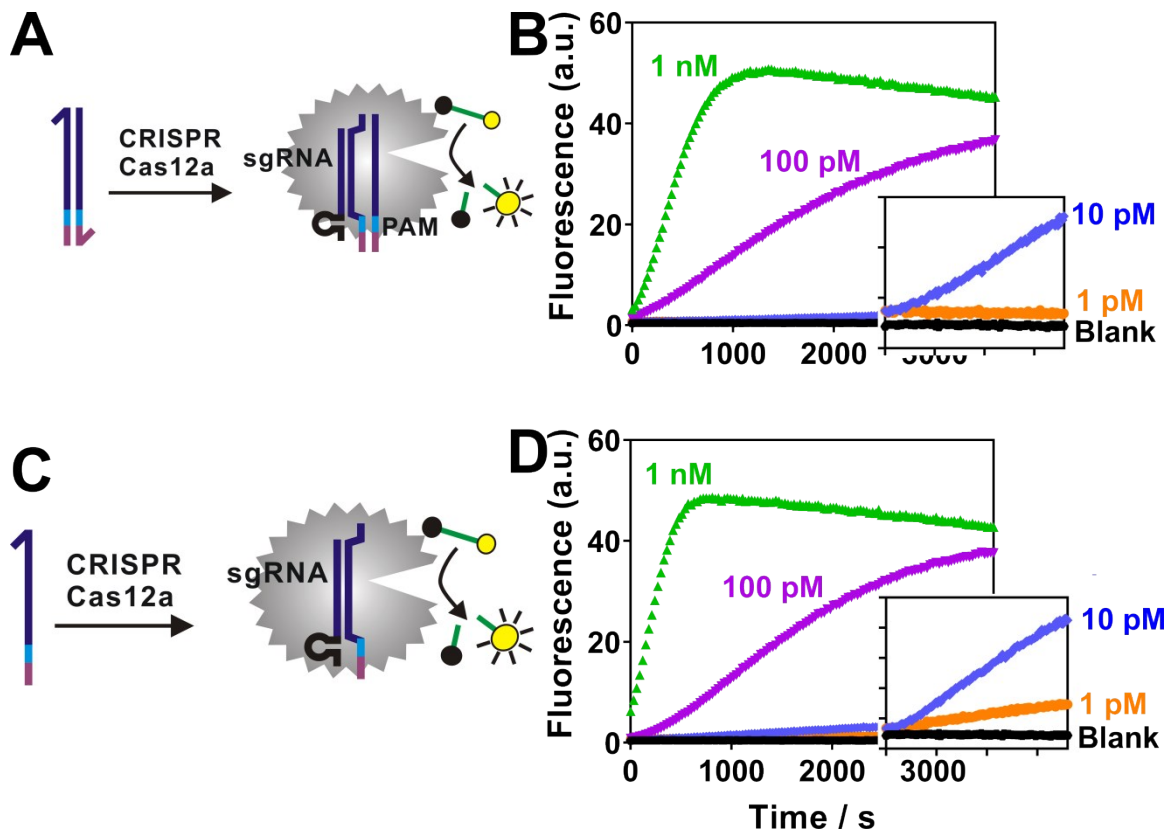

**Figure S1.** Direct detection of double-stranded DNA (dsDNA) (**A, B**) or single-stranded DNA (ssDNA) (**C, D**) using direct CRISPR RNA (crRNA) recognition and Cas12a cleavage. The limit of detection (LOD) was determined to be 10 pM for dsDNA (**B**) and 1 pM for ssDNA (**D**).

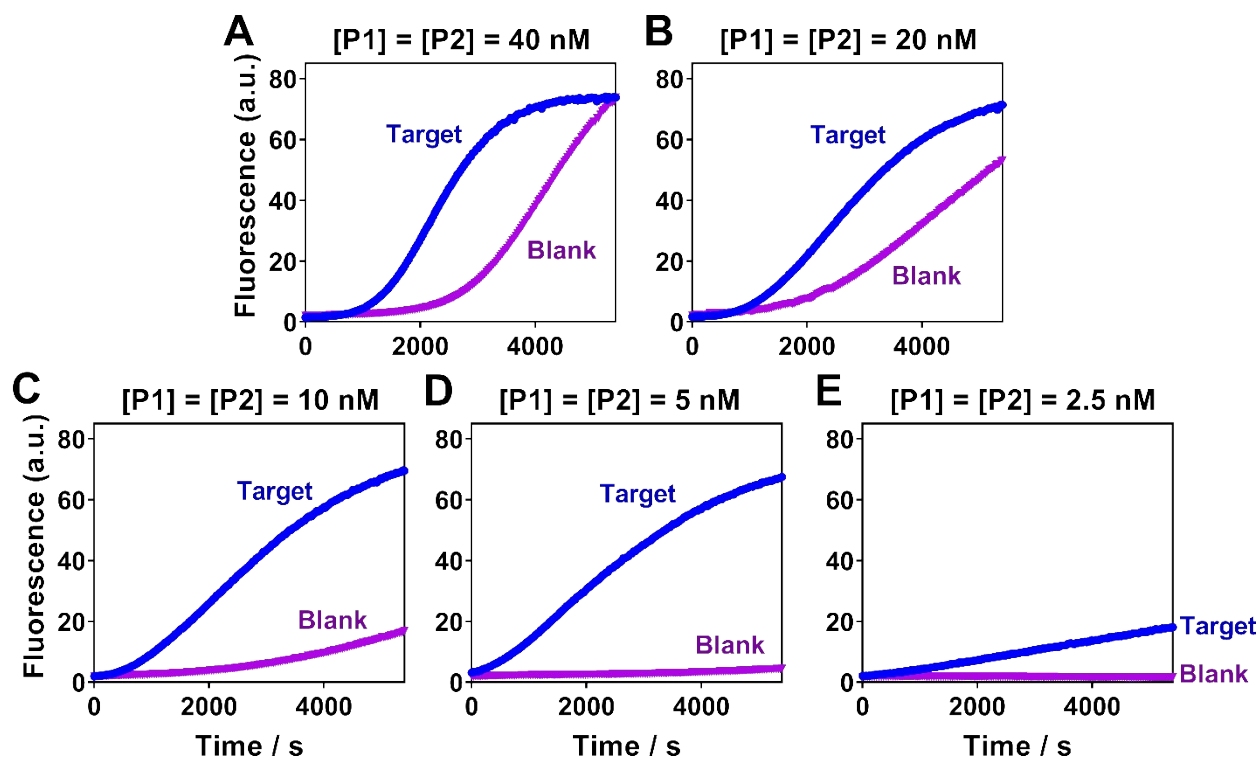

**Figure S2.** Optimization of the concentrations of proximity probes P1 and P2 for iPCCA. Binding-induced primer extension using varying concentrations of P1 and P2 from 40 nM to 2.5 nM. The optimal concentration of P1 and P2 is 5 nM as it maximizes the target-dependent fluorescence signal and minimizes background signal.

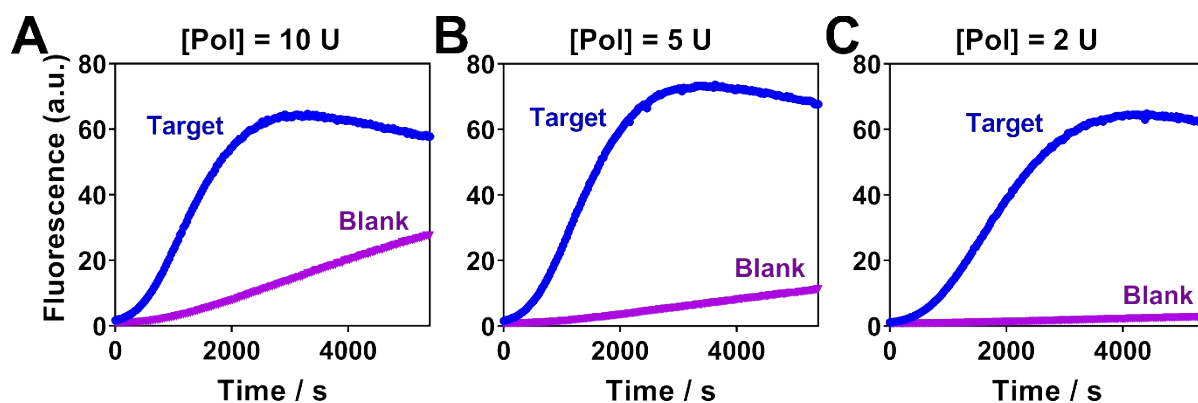

**Figure S3.** Optimization of the concentrations of DNA polymerase (Klenow Fragment, unit) for iPCCA. The optimal amount of Klenow Fragment was found to be 5 units, as it maximizes detection signals and kinetics while maintains a reasonably low background.

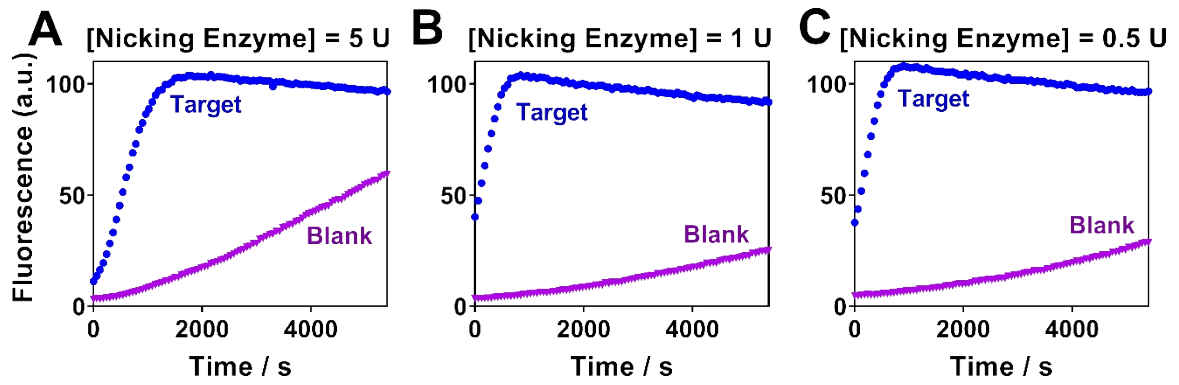

**Figure S4.** Optimization of nicking endonuclease for iPCCA. The optimal amount of nicking endonuclease was found to be 0.5 units, as it maximizes detection signals and minimizes the background.

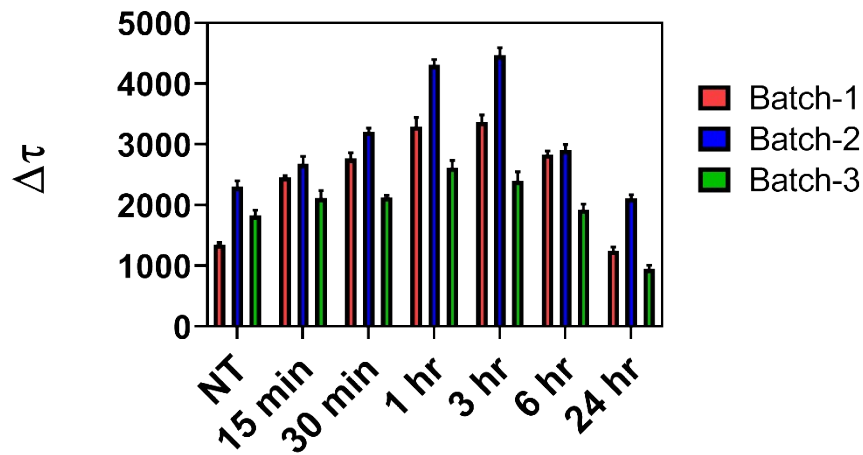

**Figure S5.** Quantitative profiling of allergen-mediated mast cell activation in three independent cultures of BMDCs. The same temporal profiles were obtained from each culture of mast cells sensitized using TNP-specific IgE and stimulated with 100 ng/ml TNP-BSA and SCF for the indicated time points.
